# Supplementary material for: Methyl-substituted cucurbit[6]uril-based microporous supramolecular frameworks for highly selective Et2O/CH3OH adsorption
Source: Royal Society of Chemistry journal article supplement (doi:10.1039/c5ce02414e), 2016-01-01
Supplement: c5ce02414e1.pdf [file c5ce02414e1.pdf]

# Methyl-Substituted Cucurbit[6]uril-Based Microporous Supramolecular Frameworks for Highly Selective Et<sub>2</sub>O/CH<sub>3</sub>OH Adsorption

Chuan-Zeng Wang, Wen-Xuan Zhao, Fang-Fang Shen, Yun-Qian Zhang, Qian-Jiang Zhu, Xin Xiao\*, and Zhu Tao\*

*Key Laboratory of Macrocyclic and Supramolecular Chemistry of Guizhou Province, Guizhou University, Guiyang, Guizhou 550025, China*

## EXPERIMENTAL SECTION

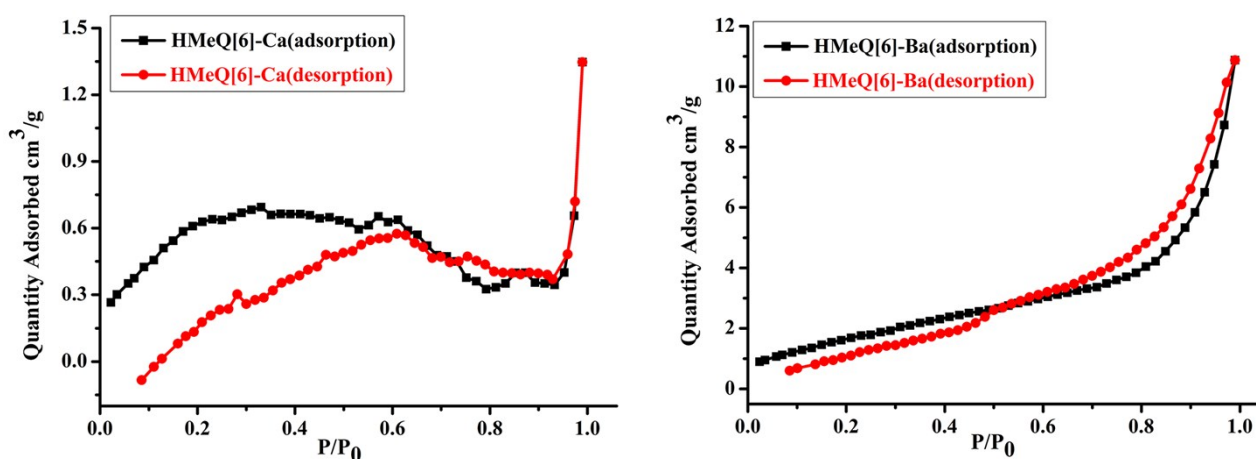

Fig. S1. The sorption isotherms of N<sub>2</sub> at 77 K by a micrometrics ASAP2020HD88 automated sorption analyser. ■ symbol = adsorption and, ● symbol = desorption of the AE<sup>2+</sup>-HMeQ[6]-[CdCl<sub>4</sub>]<sup>2-</sup>-based microporous materials.

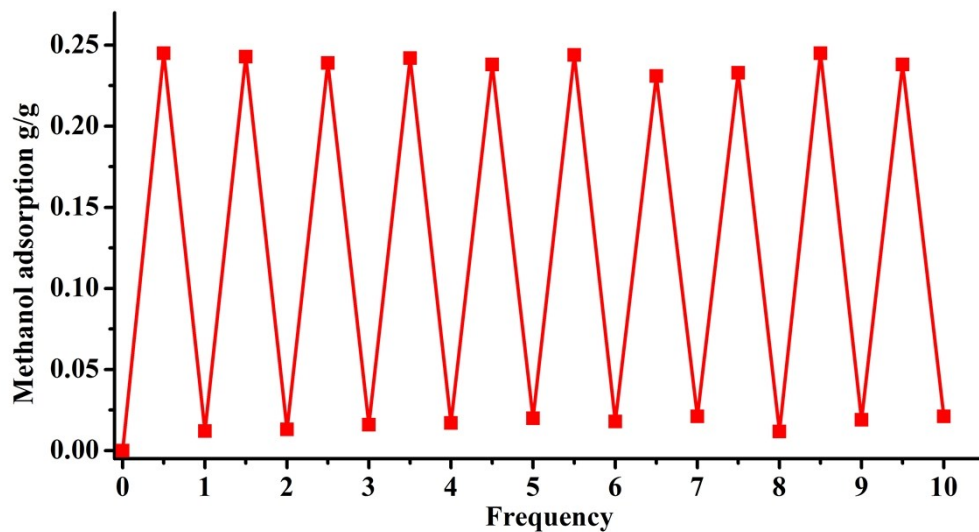

Fig. S2. Recyclability tests for methanol adsorption of the  $\text{Ba}^{2+}$ -HMeQ[6]- $[\text{CdCl}_4]^{2-}$  system microporous material.

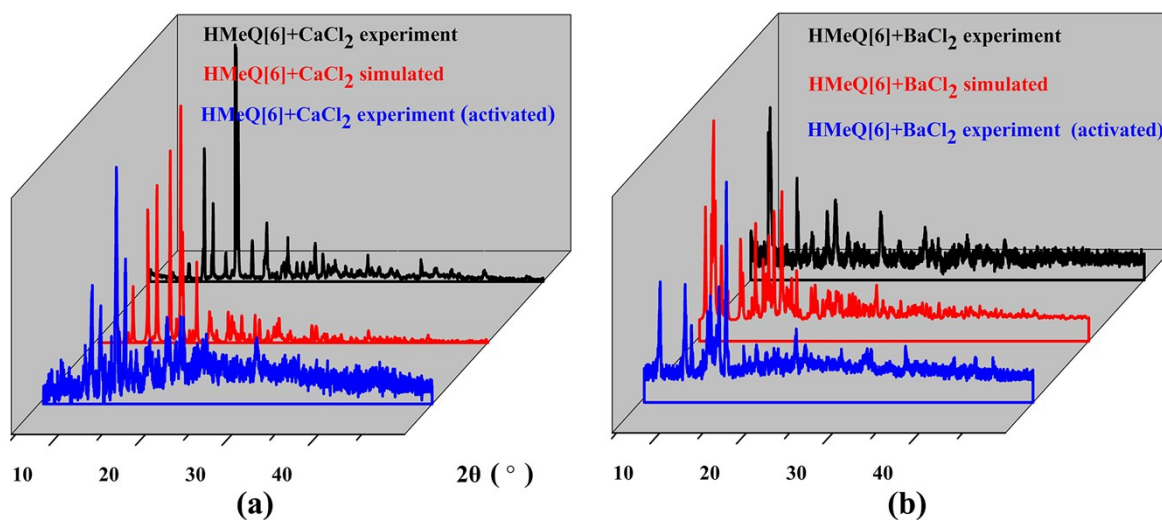

Fig. S3. Powder X-ray diffraction (PXRD) of the coordination complexes **1**, **2** and the corresponding comparison with simulation.

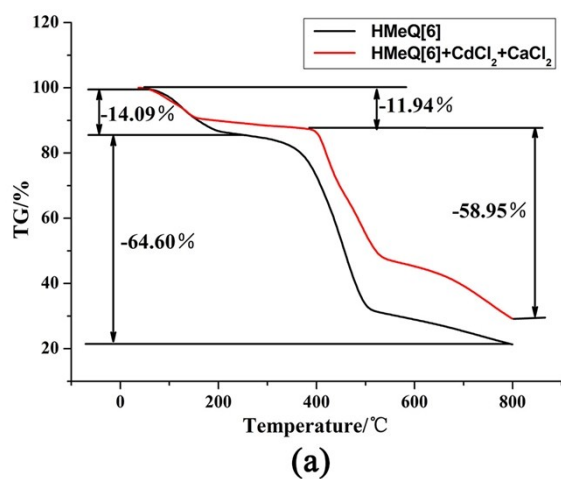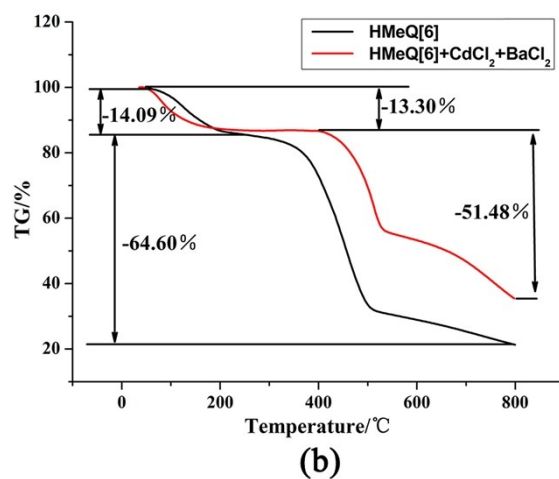

Fig. S4. TG curves of the coordination complexes **1**, **2** and the corresponding comparison with HMeQ[6] powder in N<sub>2</sub> respectively.
